# Supplementary material for: Wearable self-powered intelligent textile with optical–electrical dual-mode functionality for pressure distribution detection and remote intelligent control
Source: Royal Society of Chemistry journal article supplement (doi:10.1039/d4tc03728f), 2024-01-01
Supplement: d4tc03728f1.pdf [file d4tc03728f1.pdf]

**Wearable Self-Powered Intelligent Textile with Optical-Electrical Dual-Mode  
Functionality for Pressure Distribution Detection and Remote Intelligent Control**

Junhuan Li,<sup>‡a</sup> Zhen Tian,<sup>‡a</sup> Li Su,<sup>\*ab</sup> Yilong Yang,<sup>a</sup> Chang Ding,<sup>a</sup> Chen Wang,<sup>a</sup> Ming Sun,<sup>a</sup> and Yong Zhao<sup>\*ab</sup>

<sup>a</sup> Hebei Key Laboratory of Micro-Nano Precision Optical Sensing and Measurement Technology, School of Control Engineering, Northeastern University at Qinhuangdao, Taishan-Rode 143, Qinhuangdao, Hebei 066004, China.

E-mail: [suli@neuq.edu.cn](mailto:suli@neuq.edu.cn); [zhaoyong@ise.neu.edu.cn](mailto:zhaoyong@ise.neu.edu.cn)

<sup>b</sup> College of Information Science and Engineering, Northeastern University, Wenhua-Rode 11, Shenyang, Liaoning 110819, China

E-mail: [suli@neuq.edu.cn](mailto:suli@neuq.edu.cn); [zhaoyong@ise.neu.edu.cn](mailto:zhaoyong@ise.neu.edu.cn)

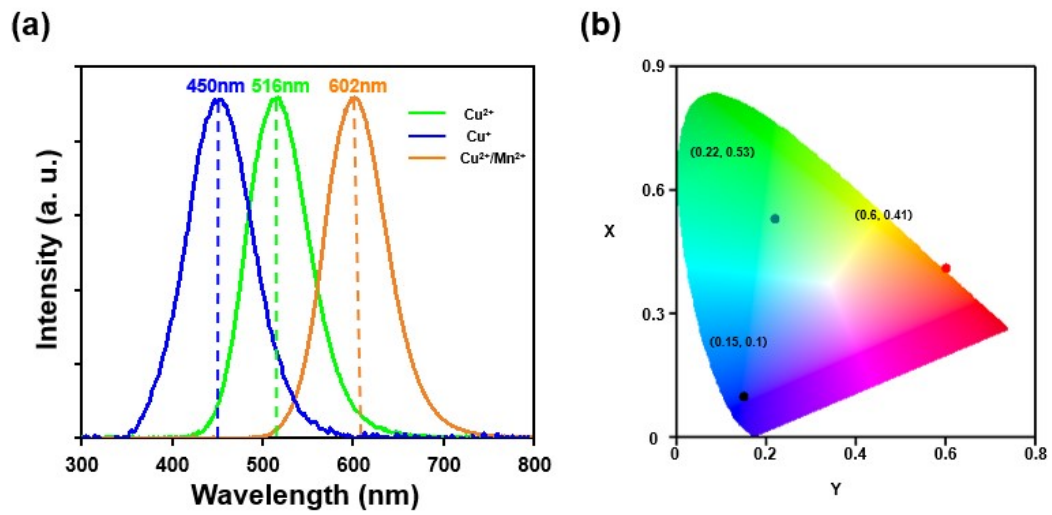

Fig. S1. (a) The photoluminescent spectra and (b) the CIE coordinates of WSIT with different phosphors ( $\text{ZnS}:\text{Cu}^{2+}$ ,  $\text{ZnS}:\text{Cu}^{2+}/\text{Mn}^{2+}$ , and  $\text{ZnS}:\text{Cu}^+$  phosphors) of blue, green, and orange lights.

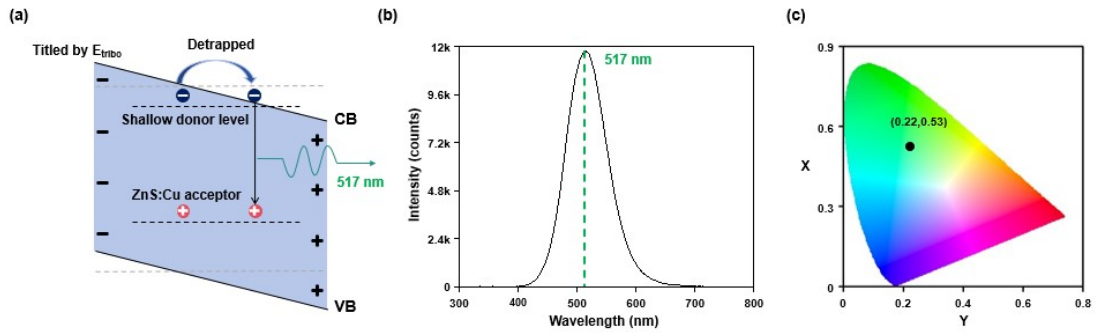

Fig. S2. (a) Band diagram indicating the TIEL mechanism of the ZnS:Cu. (b) A typical TIEL spectrum of the WSIT and (c) its corresponding CIE coordinates.

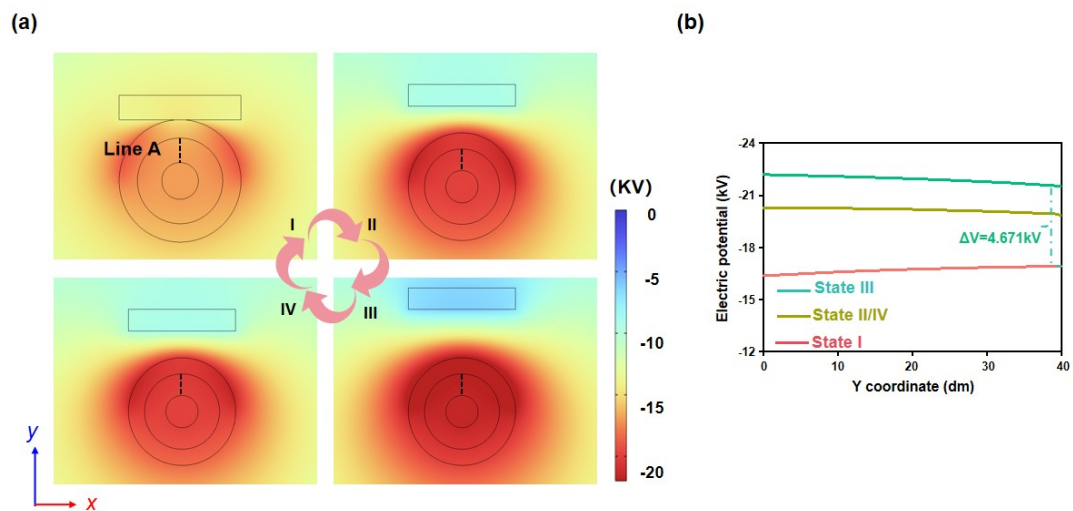

Fig. S3. (a) Numerical calculation of the electric potential distribution of ZnS:Cu phosphors in four states within a complete contact-separation working cycle through COMSOL software. (b) The corresponding electric potential variation along the black dashed line A in the four states in (a).

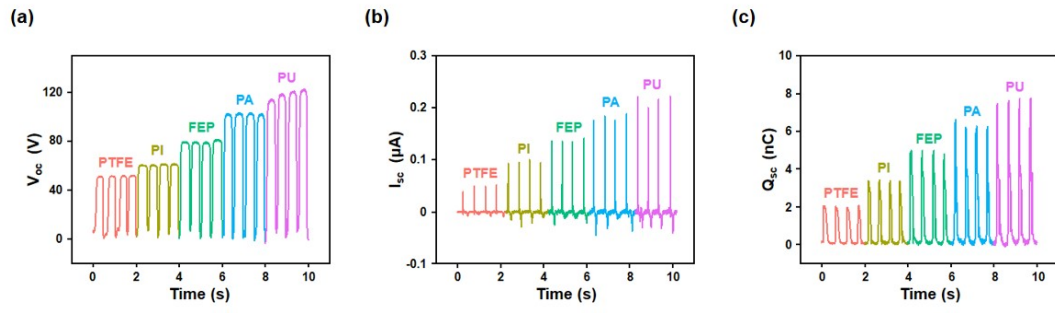

Fig. S4. Electrical output (a)  $V_{oc}$ , (b)  $I_{sc}$  and (c)  $Q_{sc}$  of WSIT as obtained when the five types of materials are taken as the contacting object. (Pressure:5 N, Frequency: 2 Hz)

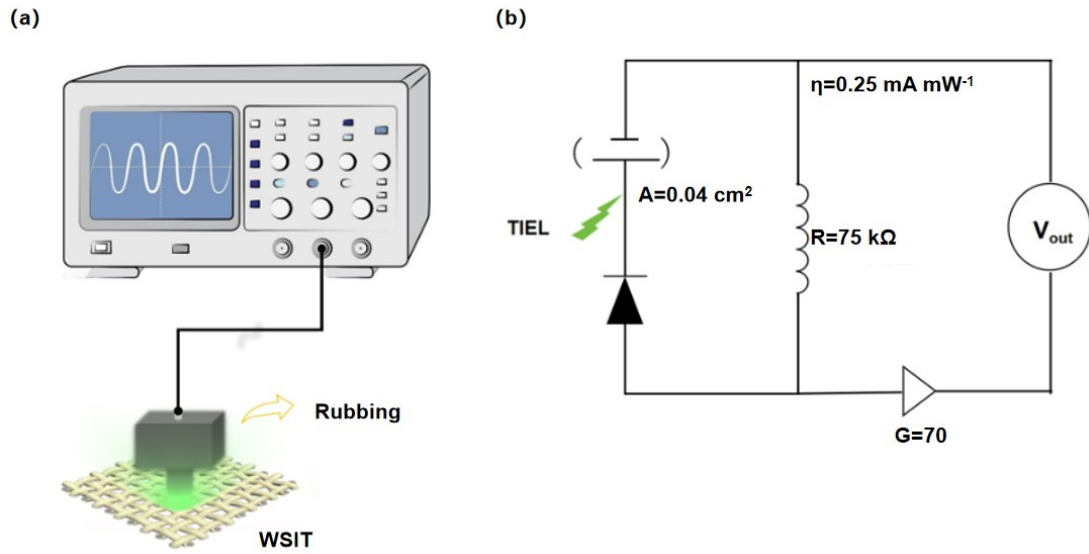

Fig. S5. (a) Schematic diagram of the test platform developed for the quantitative measurement of the optical power density of the WSIT. (b) Working mechanism of the TIEL optical power density detection performed by using a customized photodetector and the major parameters of the photodetector.

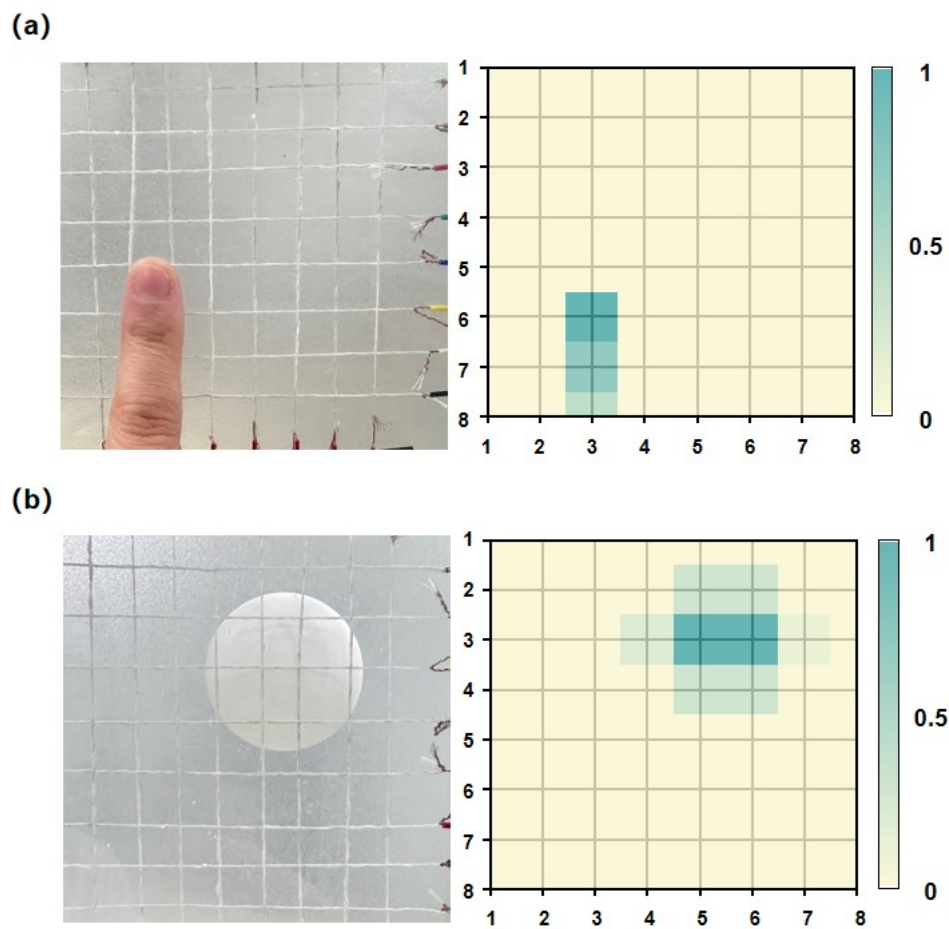

Fig. S6. (a) Photographs of the  $8 \times 8$  pixels sensing fabric when a finger was pressed on the fabric and the corresponding 3D output signals. (b) Photographs of the  $8 \times 8$  pixels sensing fabric when a table tennis ball was gently pressed on the fabric and the corresponding 3D output signals.

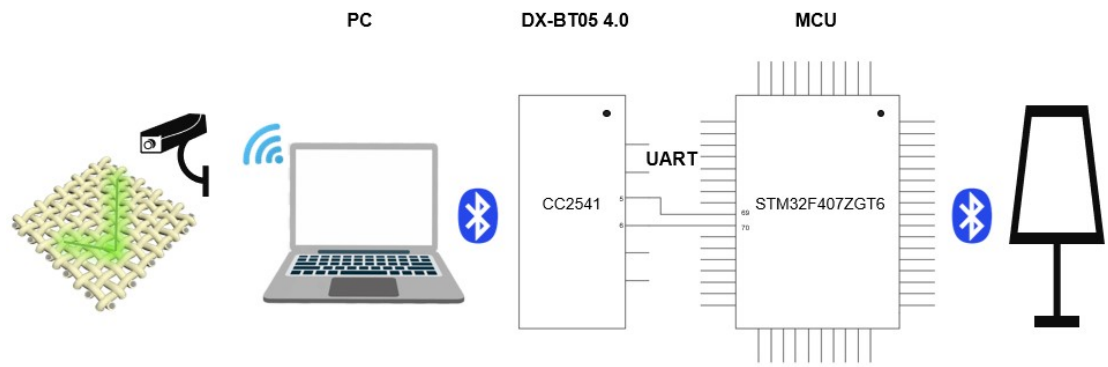

Fig. S7. The flow chart of the intelligent control system for a desk lamp through TIEL signals.



Table S1. A summary of ML/EL-based fabric sensors in terms of mechanism, trigger pressure/driving voltage, materials, brightness, electrical output, stability, washability, preparation method, and practical application.

| Year /Ref.         | Mechanism | Trigger pressure (MPa) /Driving voltage (V) | Materials (outside-to-inside)                 | Brightness                   | Electrical outputs      | Stability     | Washability | Preparation method             | Application                                         |
|--------------------|-----------|---------------------------------------------|-----------------------------------------------|------------------------------|-------------------------|---------------|-------------|--------------------------------|-----------------------------------------------------|
| 2023 <sup>1</sup>  | ML        | 0.5 MPa                                     | ZnS:Cu/PDMS@PU                                | None                         | None                    | 5000 cycles   | None        | Dip-coating                    | Human motion monitoring                             |
| 2020 <sup>3</sup>  | EL        | 35 V                                        | ZnS:Cu@PDMS/Cu                                | None                         | None                    | 1500 cycles   | None        | Dip-coating                    | Human motion monitoring                             |
| 2021 <sup>9</sup>  | ML        | None                                        | ZnS:Cu@PDMS/Cu                                | None                         | 6.5 V; 50 nA; 2.2 nC    | None          | Yes         | Dip-coating                    | Human motion monitoring                             |
| 2017 <sup>15</sup> | EL        | 30 V; 2 kHz                                 | Silicone@ZnS/Silicone@Ag Nws/PET              | 202 cd/m <sup>2</sup>        | None                    | 500 cycles    | Yes         | Dip-coating                    | Colorful display                                    |
| 2021 <sup>16</sup> | ML        | 1.5 MPa                                     | SEBS@ZnS:Cu/P(VDF-TrFE)/Ni-Cu                 | None                         | 9 V; 6.4 nC             | 100000 cycles | Yes         | Fermat spinning; Melt-spinning | Underwater rescue; Human-machine interface          |
| 2021 <sup>30</sup> | EL        | 7.5 V; 2 kHz                                | Silicone/ZnS@PU/Nylone/Ag                     | 115.1 cd/m <sup>2</sup>      | None                    | 100 cycles    | Yes         | Dip-coating; Melt-spinning     | Smart node; Communication platform                  |
| 2023 <sup>32</sup> | EL        | 100 V; 1 kHz                                | ZnS@PU/Nylone/Ag                              | 149 cd/m <sup>2</sup>        | None                    | None          | Yes         | Coaxial wet-spinning           | Rain-sensing; Liquid identification                 |
| 2019 <sup>48</sup> | TIEL      | 9.8 MPa                                     | PTFE/ZnS:Cu@PDMS                              | None                         | None                    | None          | None        | Casting                        | Wearable display                                    |
| 2021 <sup>49</sup> | EL        | 18 V                                        | ZnS@Dragon skin/Liquid metal/Silicone/Spandex | 488 cd/m <sup>2</sup>        | None                    | None          | Yes         | Dip-coating                    | Controllable pattern display                        |
| 2018 <sup>50</sup> | EL        | 100 V; 1.5 kHz                              | Hydrogel/ZnS:Cu@Silicone                      | None                         | None                    | 1000 cycles   | None        | Coaxial wet-spinning           | Brain-interfaced communications                     |
| This work          | TIEL      | 1 N; 0.002 MPa                              | Skin/PTFE/ZnS:Cu@P MMA/Nlyon/Ag               | 5.17 $\mu$ W/cm <sup>2</sup> | 120V; 0.25 $\mu$ A; 8nC | 2000 cycles   | Yes         | Electrospinning; Dip-coating   | Pressure detection; Intelligent control; Smart home |

"None" means not mentioned; SEBS: Poly(styrene-b-(ethylene-co-butylene)-b-styrene); P(VDF-TrFE): Poly(vinylidene fluoride-trifluoroethylamine); PDMS: Polydimethylsiloxane; PTFE: Poly tetrafluoroethylene; PU: Polyurethane; PMMA: Polymethyl methacrylate; PET: Polyethylene glycol terephthalate

### Note S1. COMSOL model setting

In the process of simulation, the radius of conductive yarn is set to 0.3 mm, the thickness of ZnS:Cu@PMMA coating is set to 0.4 mm, and the thickness of PTFE coating is set to 0.3 mm. The distance from state II and state IV from skin to WSIT is fixed at 0.5 mm. In State III, the distance between the skin and WSIT is set to 0.9 mm. The surface charge density of the skin and PTFE is set to  $2 \times 10^4 \text{ C/m}^2$  and  $2 \times 10^{-4} \text{ C/m}^2$ , respectively. The unit as a whole is surrounded by a ground air block with a side length of 100 mm. The dielectric constants set for the simulation are as follows:  $\epsilon = 1.0$  (air),  $\epsilon = 1$  (skin),  $\epsilon = 2.2$  (PTFE),  $\epsilon = 3.5$  (PMMA), and  $\epsilon = 1$  (silver wire).

Note S2. Estimated optical power density ( $P$ ) of TIEL

An oscilloscope and a light detector are used to measure the optical voltage  $V$ . The optical power density ( $P$ ) is calculated through the following equation.

$$P = \frac{V}{\eta G R S}$$

where  $V$  represents the measured photovoltage;  $\eta$  denotes the optical conversion efficiency, which is  $0.25 \text{ mA mW}^{-1}$ ;  $G$  refers to the gain, which is 70;  $R$  indicates the resistance, which is  $75 \text{ k}\Omega$ ;  $S$  represents the effective sensitive area of the light detector, which is  $4 \text{ mm}^2$ .

Note S3. Illustration of the self-developed software for remote intelligent control of an entertainment game

The optical flow tracking algorithm starts by extracting the representative feature points from the image. Then, it matches the feature points between adjacent frames, so as to find the corresponding pair of feature points. Given the matched pair of feature points, the motion vector of each feature point is calculated by comparing the difference in brightness of these pixel points. The calculated motion vector is used to estimate the overall motion of the external object for further control the motion of the figure in the game.

#### Note S4. Illustration of the intelligent control system for a desk lamp

The schematic diagram of the flow chart of the system is shown in Fig. S7. Firstly, the camera is used to transmit the image to the computer. Then, the computer is used to process the input image, judge it through deep learning, and transmit the result to DX-BT05 MCU through Bluetooth. Finally, the MCU is used to figure out the instructions, determining and shifting the state of the desk lamp logically.
